# Supplementary material
Source: PubMed Central journal article supplement (PMC6917508)
Supplement: EMS85190-supplement-SI.pdf [file EMS85190-supplement-SI.pdf]

# Structures and Energetics of Neutral and Cationic Pyrene Clusters

## Supplementary Materials

Léo Dontot, Fernand Spiegelman, Mathias Rapacioli\*

*Laboratoire de Chimie et Physique Quantiques LCPQ/IRSAMC, UMR5626, Université de Toulouse (UPS) and CNRS, 118 Route de Narbonne, F-31062 Toulouse, France.*

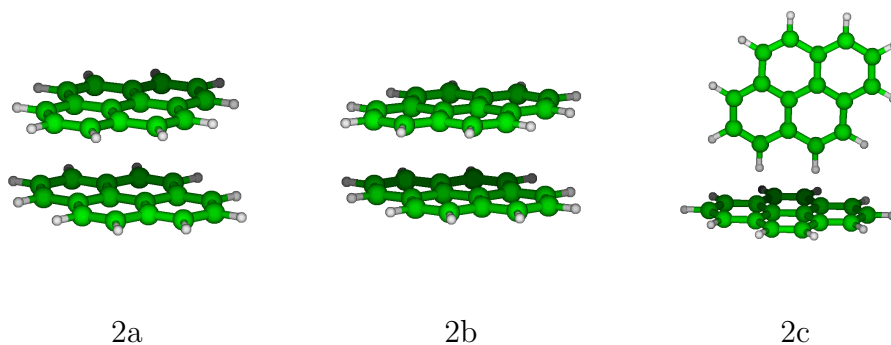

Figure S1: most stable structures for neutral pyrene dimers

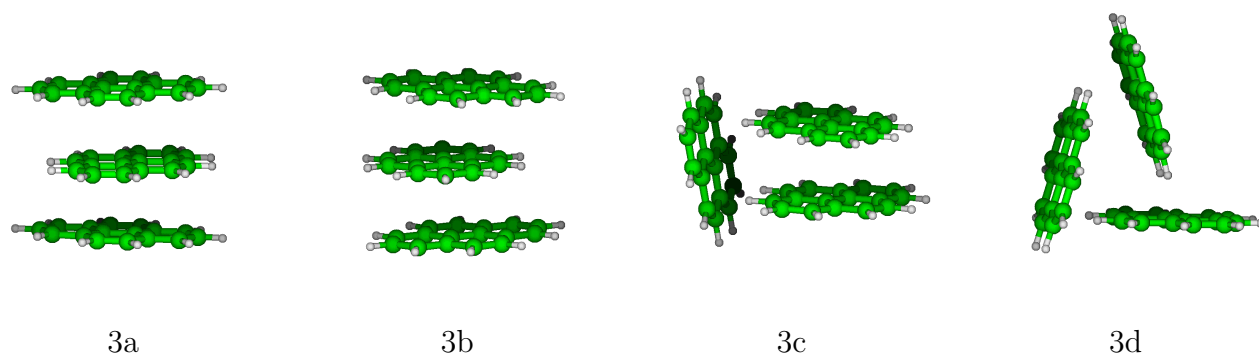

Figure S2: most stable structures for neutral pyrene trimer

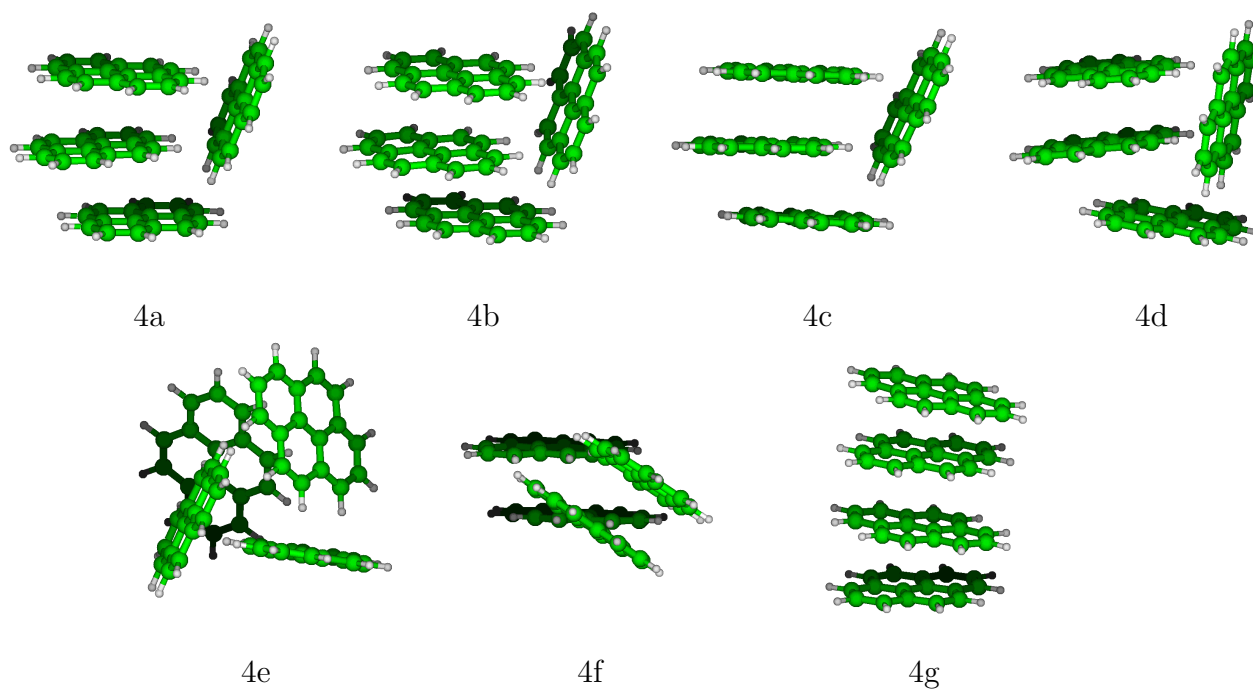

Figure S3: most stable structures for neutral pyrene tetramer

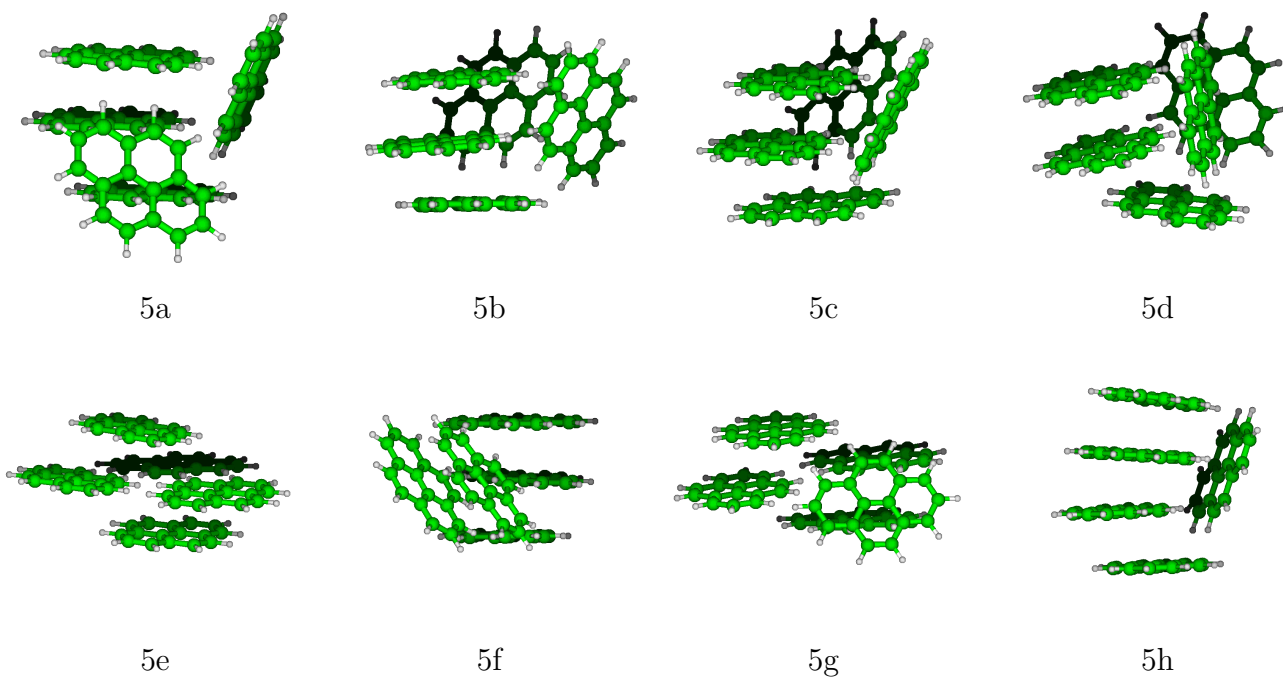

Figure S4: most stable structures for neutral pyrene pentamer

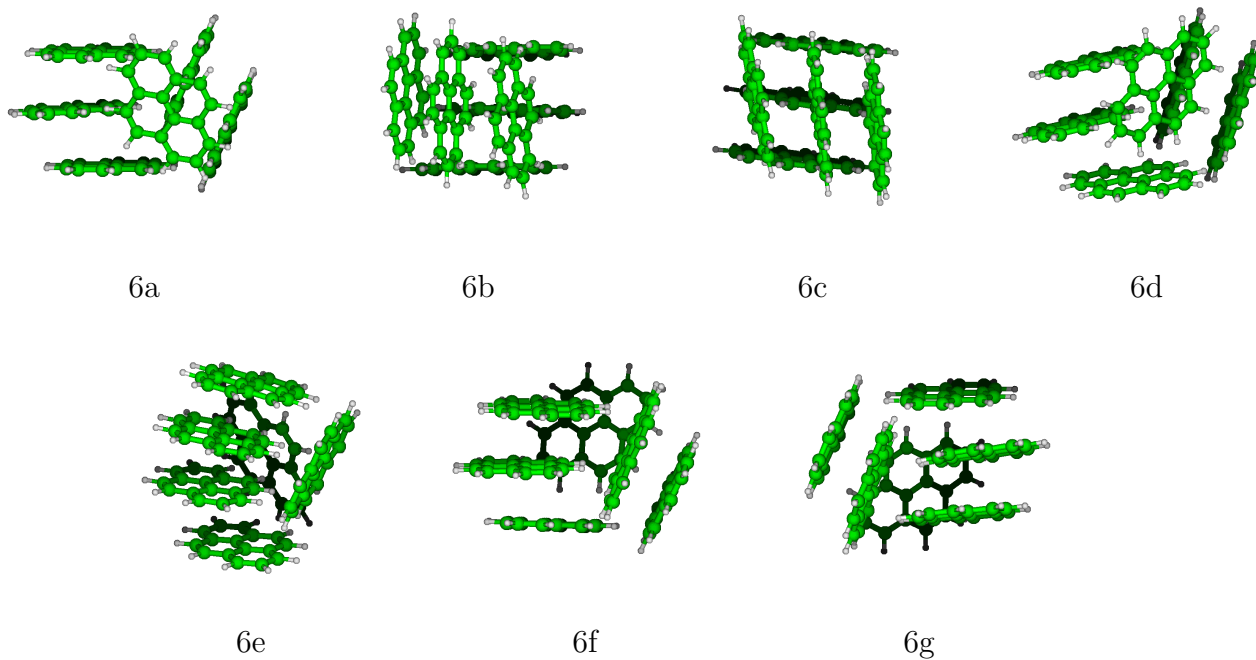

Figure S5: most stable structures for neutral pyrene hexamer

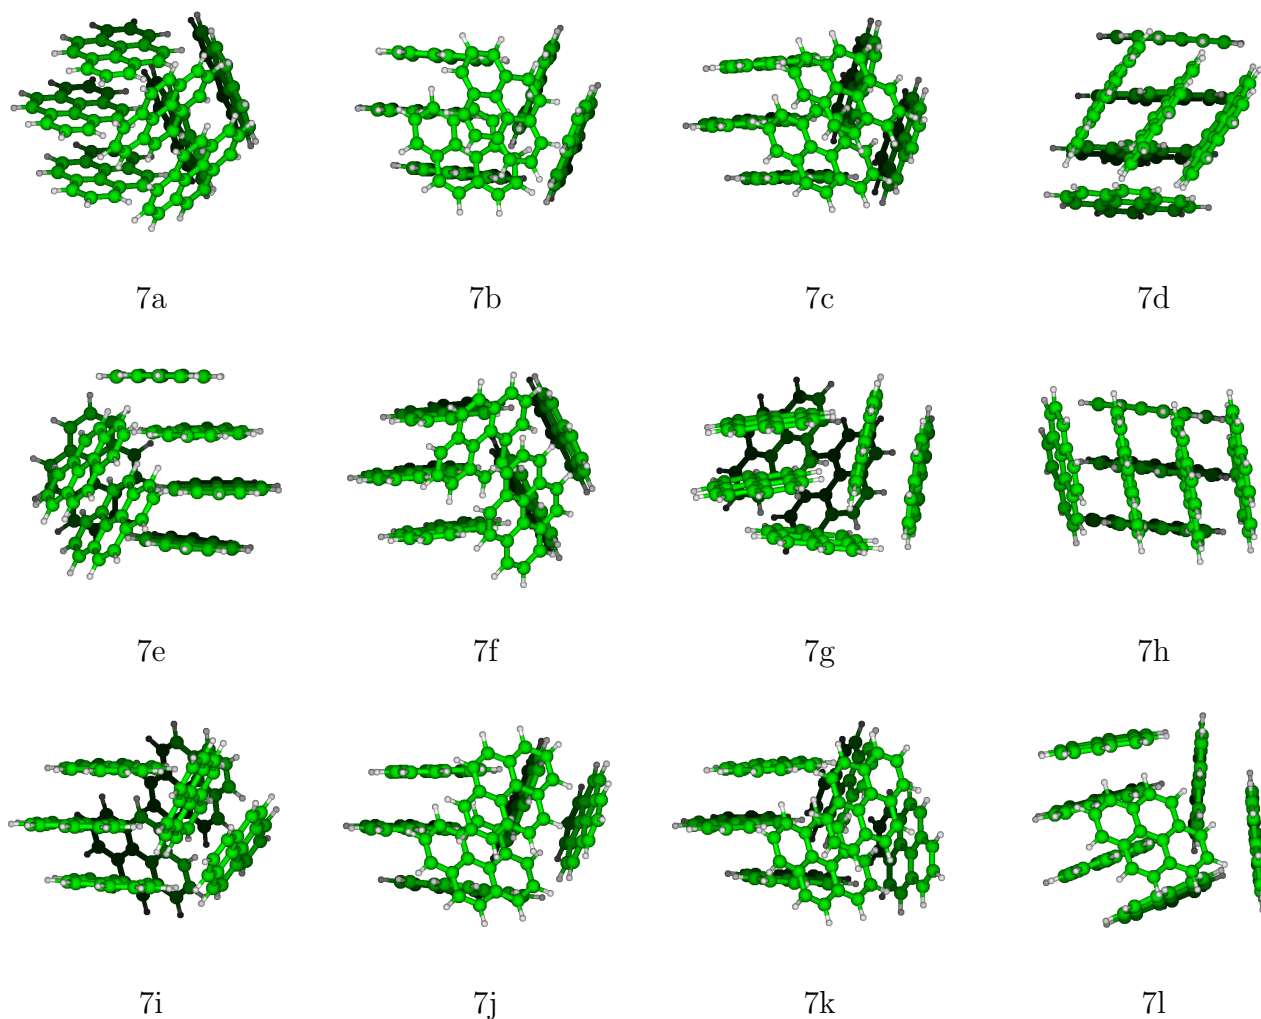

Figure S6: most stable structures for neutral pyrene heptamer

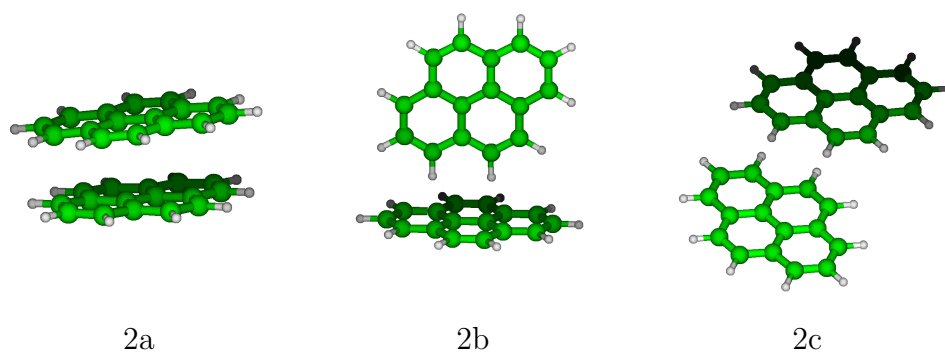

Figure S7: most stable structures for cationic pyrene dimers

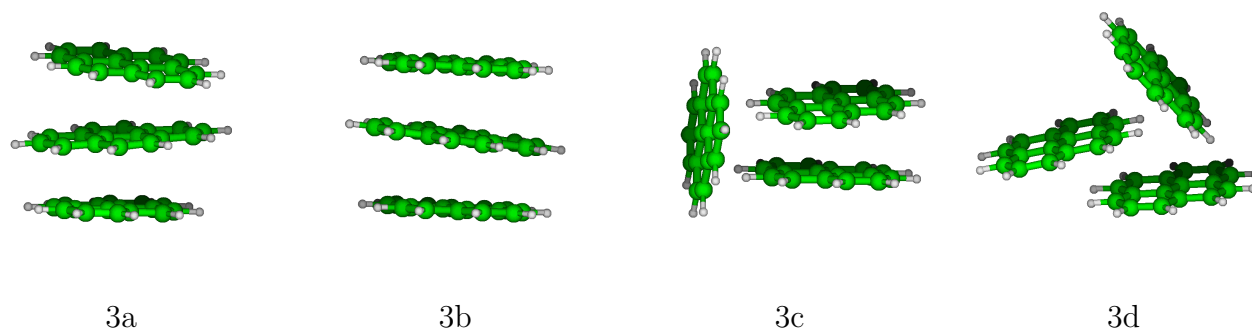

Figure S8: most stable structures for cationic pyrene trimer

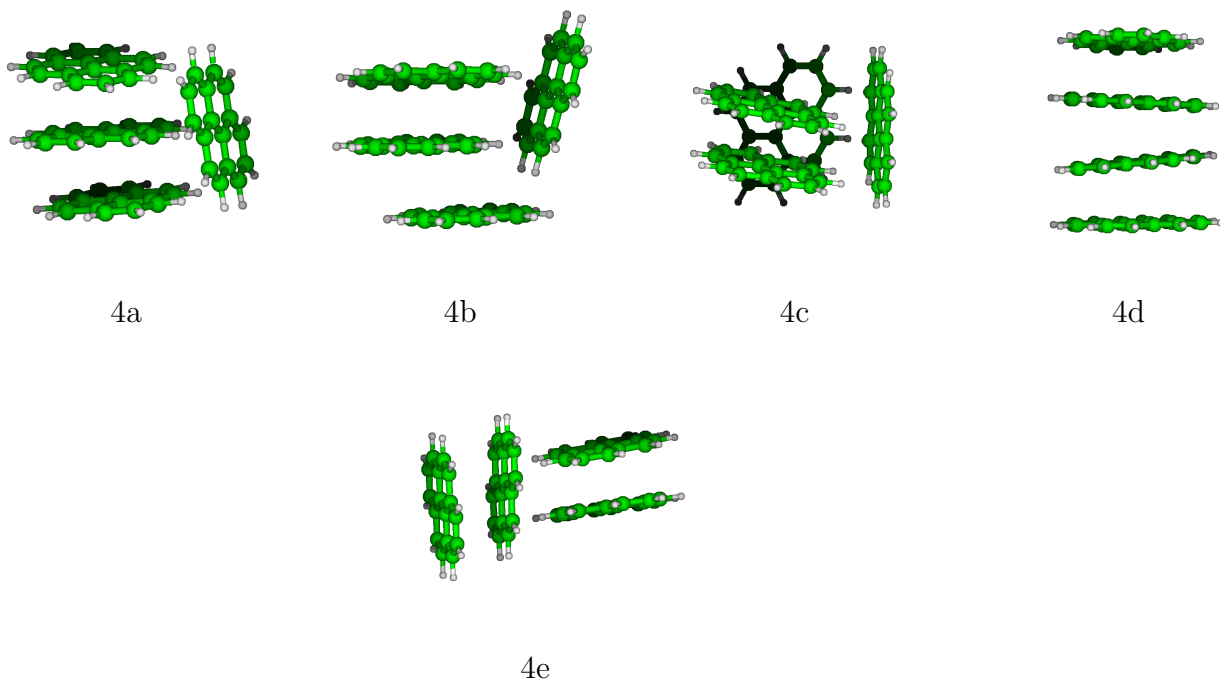

Figure S9: most stable structures for cationic pyrene tetramer

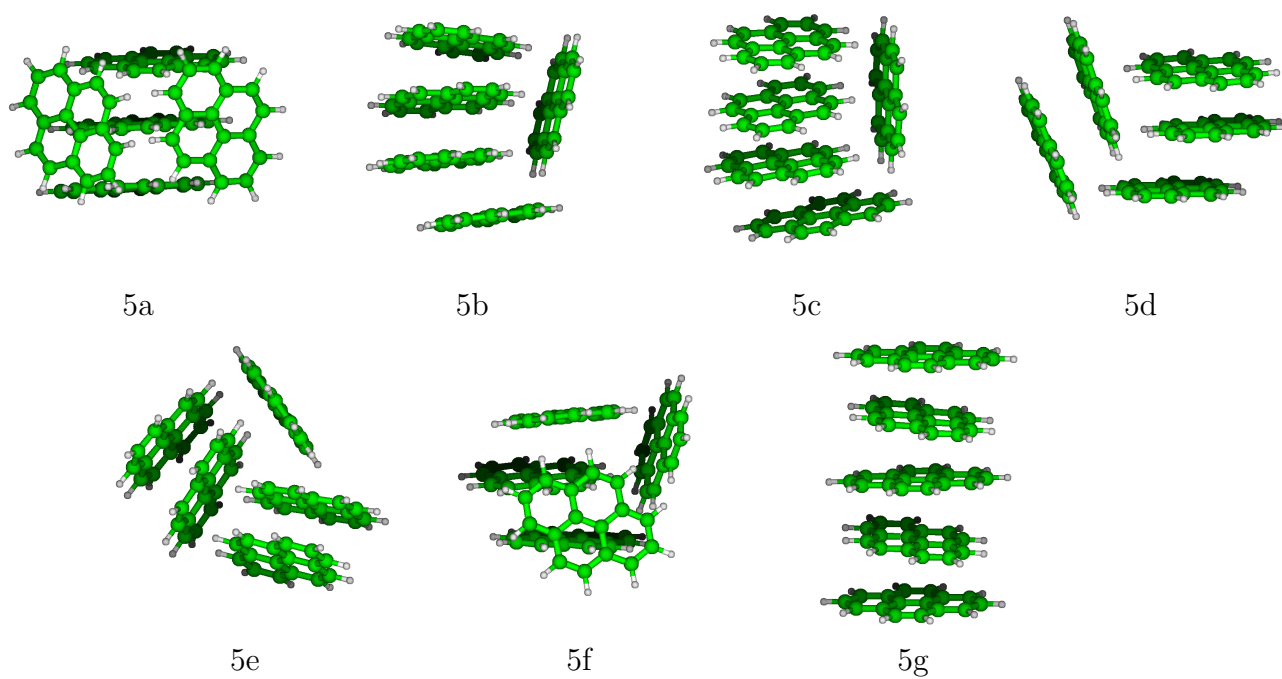

Figure S10: most stable structures for cationic pyrene pentamer

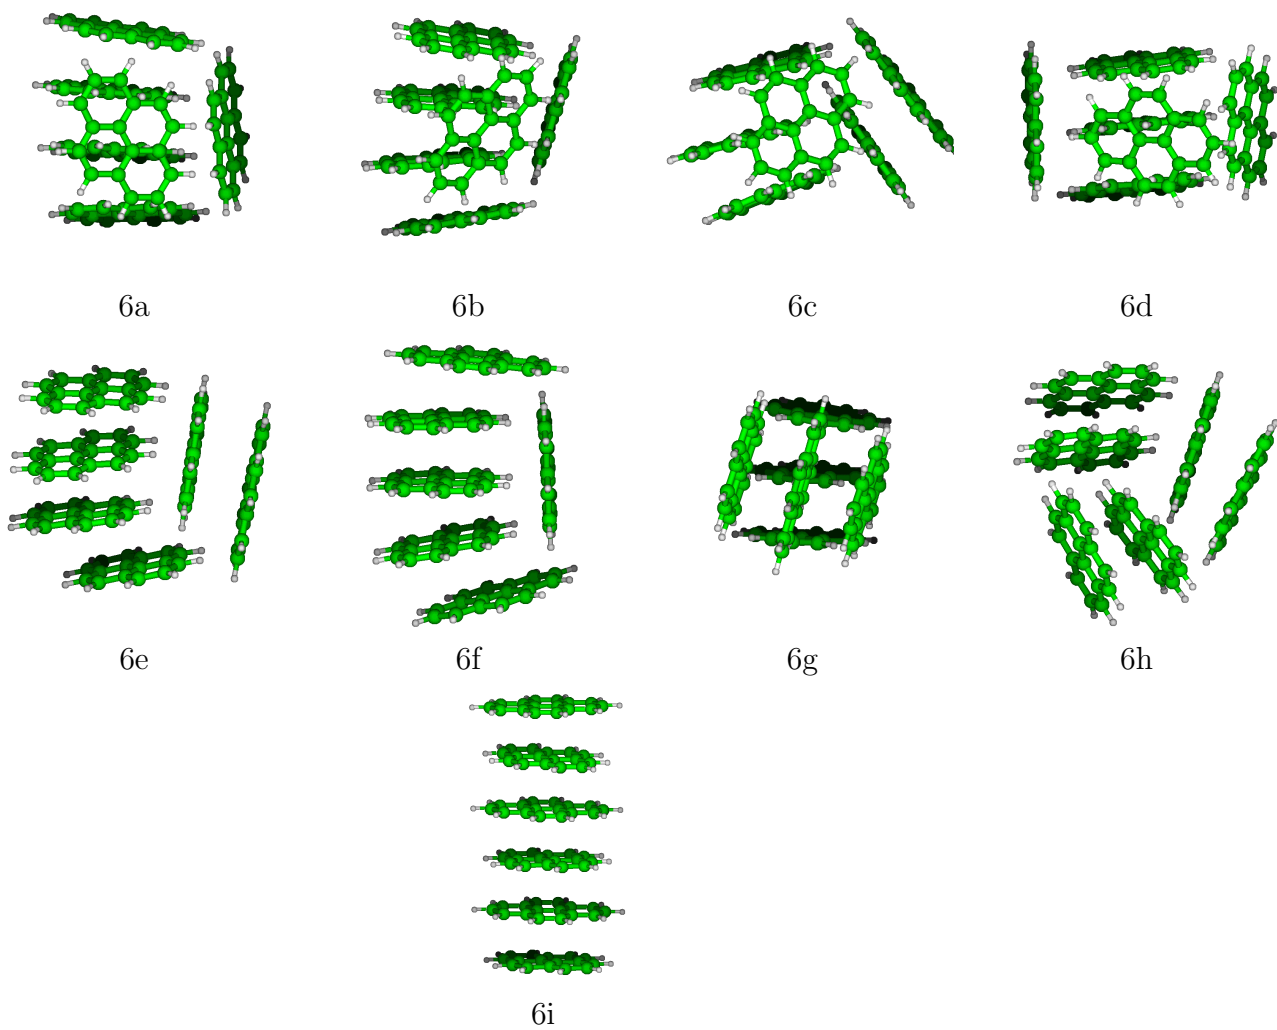

Figure S11: most stable structures for cationic pyrene hexamer

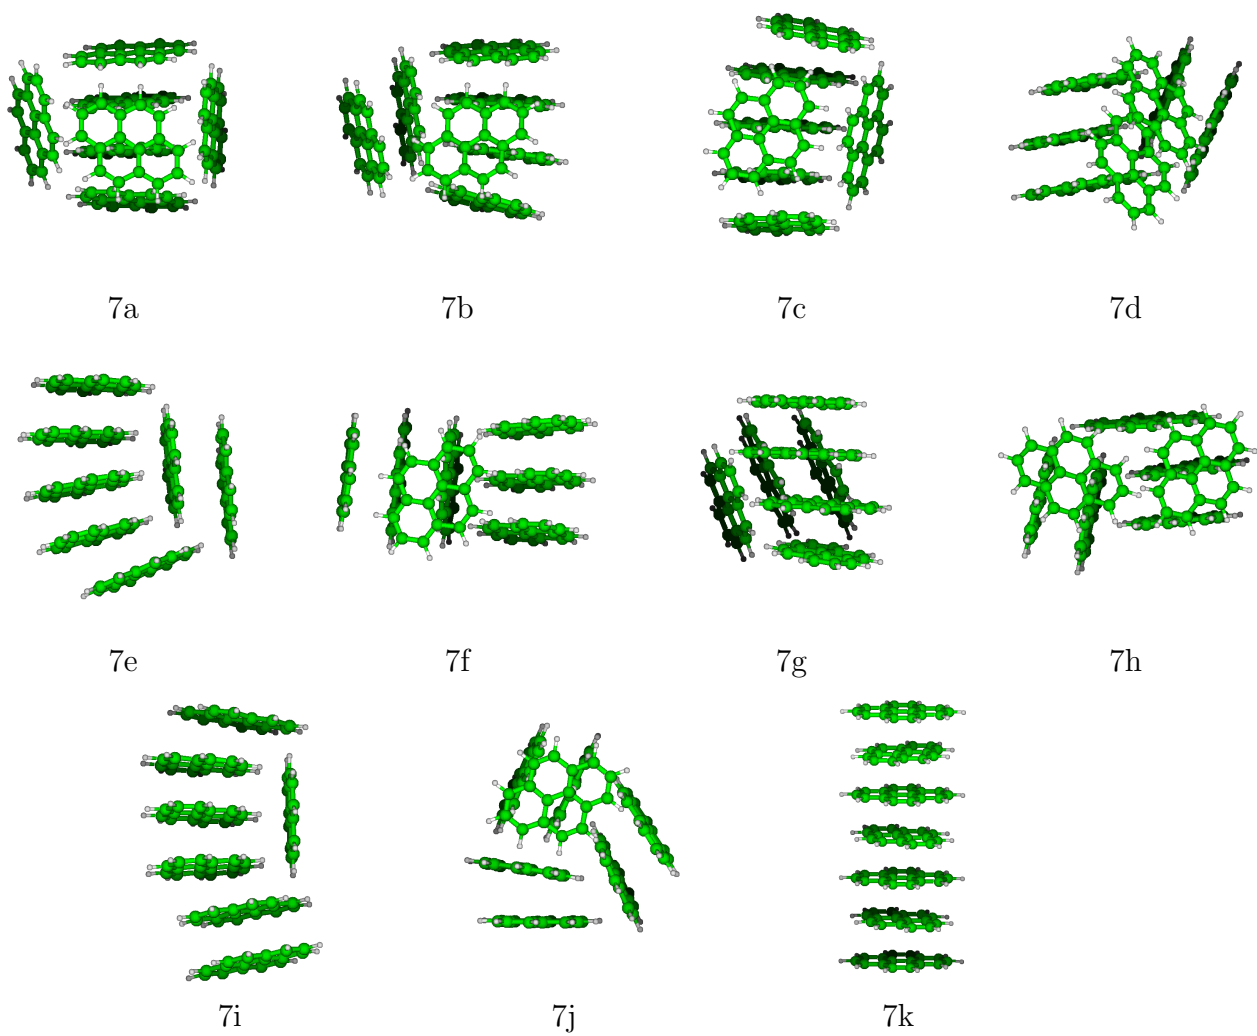

Figure S12: most stable structures for cationic pyrene heptamer
